# Supplementary material for: Allele-Specific Methylation Occurs at Genetic Variants Associated with Complex Disease
Source: PLOS journal article supplement (doi:10.1371/journal.pone.0098464), 2014-06-09

Figure S9

A

Unnormalized

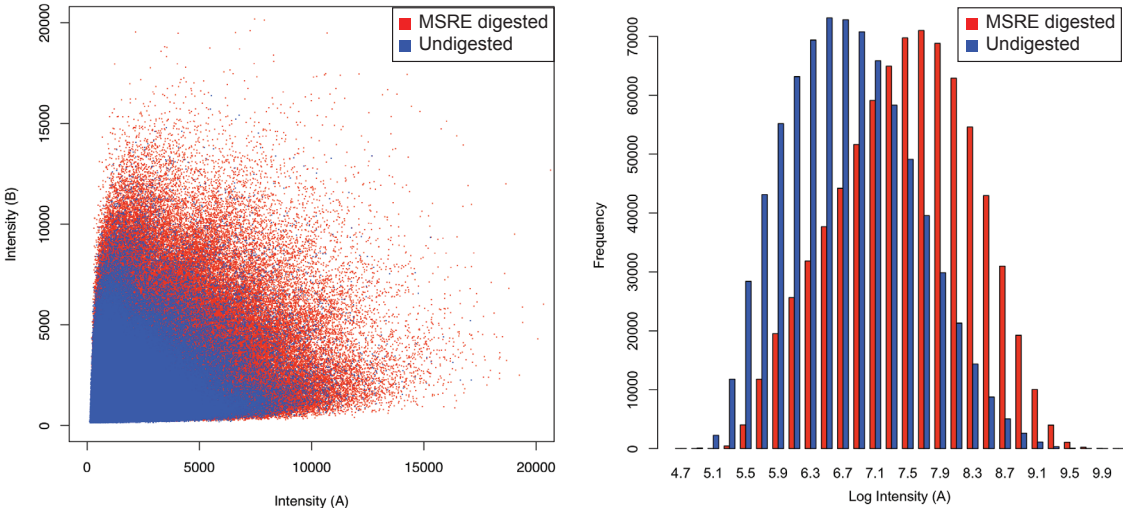

B

Median  
Normalized

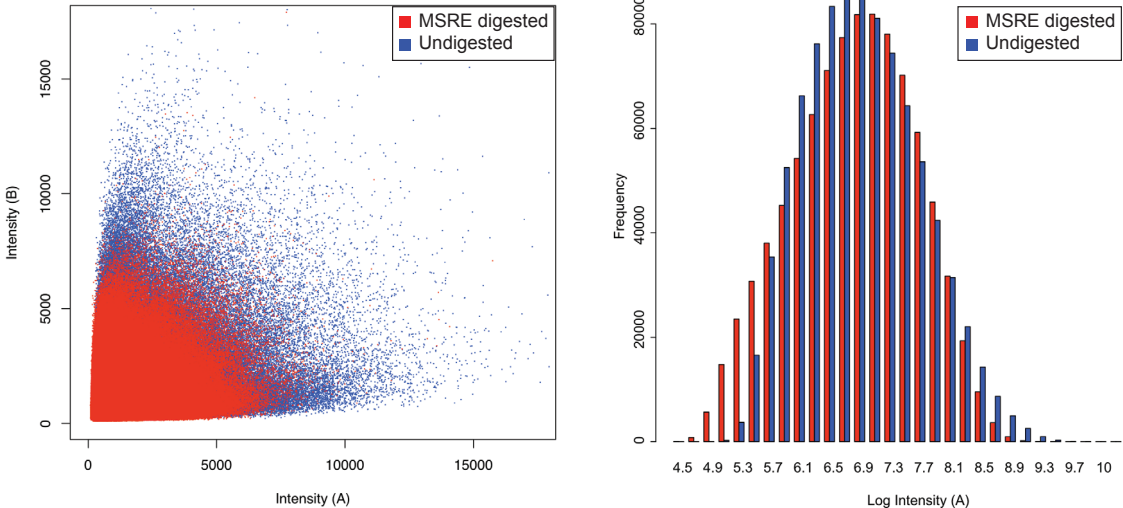

C

Quantile  
Normalized

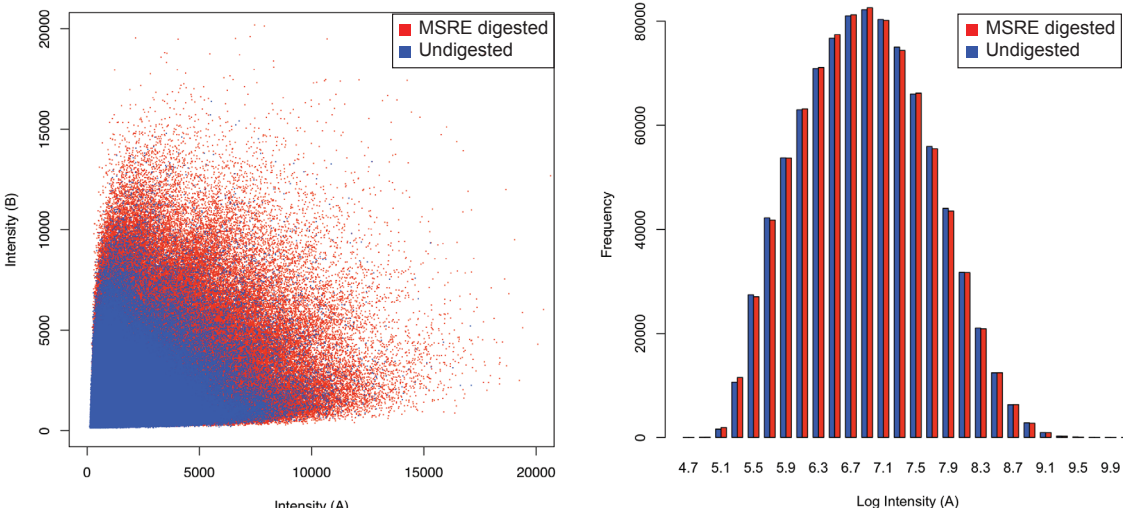

Supplement: S9 (10.1371/journal.pone.0098464.s009) [file journal.pone.0098464.s009]
